# Supplementary material for: Low-Dose Delta-9-Tetrahydrocannabinol as Beneficial Treatment for Aged APP/PS1 Mice
Source: MDPI journal article supplement (doi:10.3390/ijms23052757), 2022-03-02
Supplement: s1 [file s1]

## Supplemental Materials

### Low-Dose Delta-9-Tetrahydrocannabinol as Beneficial Treatment for Aged APP/PS1 Mice

Yanhong Wang<sup>a</sup>, Yuzhu Hong<sup>a</sup>, Jiyu Yan<sup>a</sup>, Breanna Brown<sup>a</sup>, Xiaoyang Lin<sup>a</sup>, Xiaolin Zhang<sup>b</sup>, Ning Shen<sup>a,d</sup>, Minghua Li<sup>a</sup>, Jianfeng Cai<sup>d</sup>, Marcia Gordon<sup>c</sup>, David Morgan<sup>c</sup>, Qingyu Zhou<sup>a,\*</sup>, and Chuanhai Cao<sup>a,b,\*</sup>

**Table S1.** Information of individual mice used in the present study

| Group             | Mouse ID     | Sex    | Average Latency in the Last Trial (seconds) | Average Number of Errors in the Last Trial | Memo                         |
|-------------------|--------------|--------|---------------------------------------------|--------------------------------------------|------------------------------|
| NTG Control       | MO01 222A-3  | Female | 6.28                                        | 0.667                                      |                              |
|                   | MO04 223A-2  | Female | 14.48                                       | 0.667                                      |                              |
|                   | MO10 269A-2  | Female | 23.72                                       | 1                                          |                              |
|                   | MO05 223A-8  | Male   | 34.71                                       | 5                                          |                              |
|                   | MO06 285A-2  | Male   | 15.15                                       | 1                                          |                              |
|                   | MO11 217A-4  | Male   | 17.25                                       | 1.67                                       |                              |
|                   | MO12 288A-10 | Male   | 21.26                                       | 1.67                                       |                              |
|                   | MO02 205B-1  | Male   | 4.12                                        | 1                                          | Found dead                   |
|                   | MO07 296A-2  | Male   | 20.51                                       | 1.67                                       | Euthanized due to skin ulcer |
|                   | MO08 288A-3  | Female | 10.63                                       | 1.33                                       | Found dead                   |
| TG Control        | MO18 213A-2  | Female | 22.14                                       | 2                                          | Found dead                   |
|                   | MO15 161A-7  | Female | 59.22                                       | 6                                          |                              |
|                   | MO39 217A-6  | Female | 42.17                                       | 3.33                                       |                              |
|                   | MO41 296A-10 | Female | 56.33                                       | 8                                          |                              |
|                   | MO20 285A-1  | Male   | 28.23                                       | 2.67                                       |                              |
|                   | MO23 203B-4  | Male   | 33.13                                       | 2.33                                       |                              |
|                   | MO32 185A-9  | Male   | 40.69                                       | 5                                          |                              |
|                   | MO40 296A-6  | Male   | 30.07                                       | 3                                          |                              |
| TG THC 0.02 mg/kg | MO17 205B-2  | Male   | 21.61                                       | 3.33                                       | Found dead                   |
|                   | MO14 161A-6  | Female | 26.54                                       | 2.67                                       |                              |
|                   | MO22 203B-1  | Female | 34.48                                       | 3                                          |                              |
|                   | MO26 233A-4  | Female | 35.05                                       | 4.33                                       |                              |
|                   | MO34 206A-7  | Female | 29.66                                       | 3.67                                       |                              |
|                   | MO36 199B-1  | Female | 38.41                                       | 5                                          |                              |
|                   | MO24 220A-3  | Male   | 49.39                                       | 4.33                                       |                              |
|                   | MO27 269A-1  | Male   | 46.82                                       | 3.33                                       |                              |
|                   | MO29 179B-2  | Male   | 41.87                                       | 7                                          |                              |
|                   | MO31 185A-5  | Male   | 28.96                                       | 3                                          |                              |
| TG THC 0.2 mg/kg  | MO21 198B-5  | Male   | 60                                          | 5.67                                       | Found dead                   |
|                   | MO13 161A-4  | Female | 29.93                                       | 4                                          |                              |
|                   | MO16 222A-1  | Female | 31.71                                       | 3.67                                       |                              |
|                   | MO30 185A-3  | Female | 59.97                                       | 5.33                                       |                              |
|                   | MO37 188B-2  | Female | 60                                          | 5.33                                       |                              |
|                   | MO19 213A-10 | Male   | 32.89                                       | 3                                          |                              |
|                   | MO35 266A-2  | Male   | 58.93                                       | 4.33                                       |                              |

|  |             |        |       |      |                                    |
|--|-------------|--------|-------|------|------------------------------------|
|  | MO38 217A-2 | Male   | 55.89 | 4.33 |                                    |
|  | MO25 224A-1 | Female | 57.80 | 6    | Euthanized due to intestinal tumor |
|  | MO28 288A-6 | Male   | 30.87 | 3    | Found dead                         |
|  | MO33 206A-2 | Male   | 36.17 | 3.67 | Found dead                         |

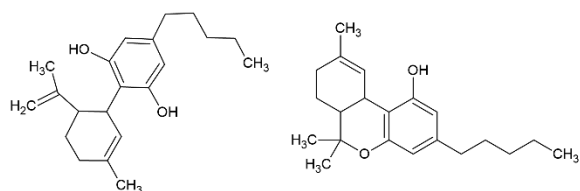

Cannabidiol (CBD)

$C_{21}H_{30}O_2$

Containing hydroxyl group

Tetrahydrocannabinol (THC)

$C_{21}H_{30}O_2$

Containing cyclic ring

**Figure S1.** Structures of cannabidiol (CBD and  $\Delta$ -9-tetrahydrocannabinol (THC)

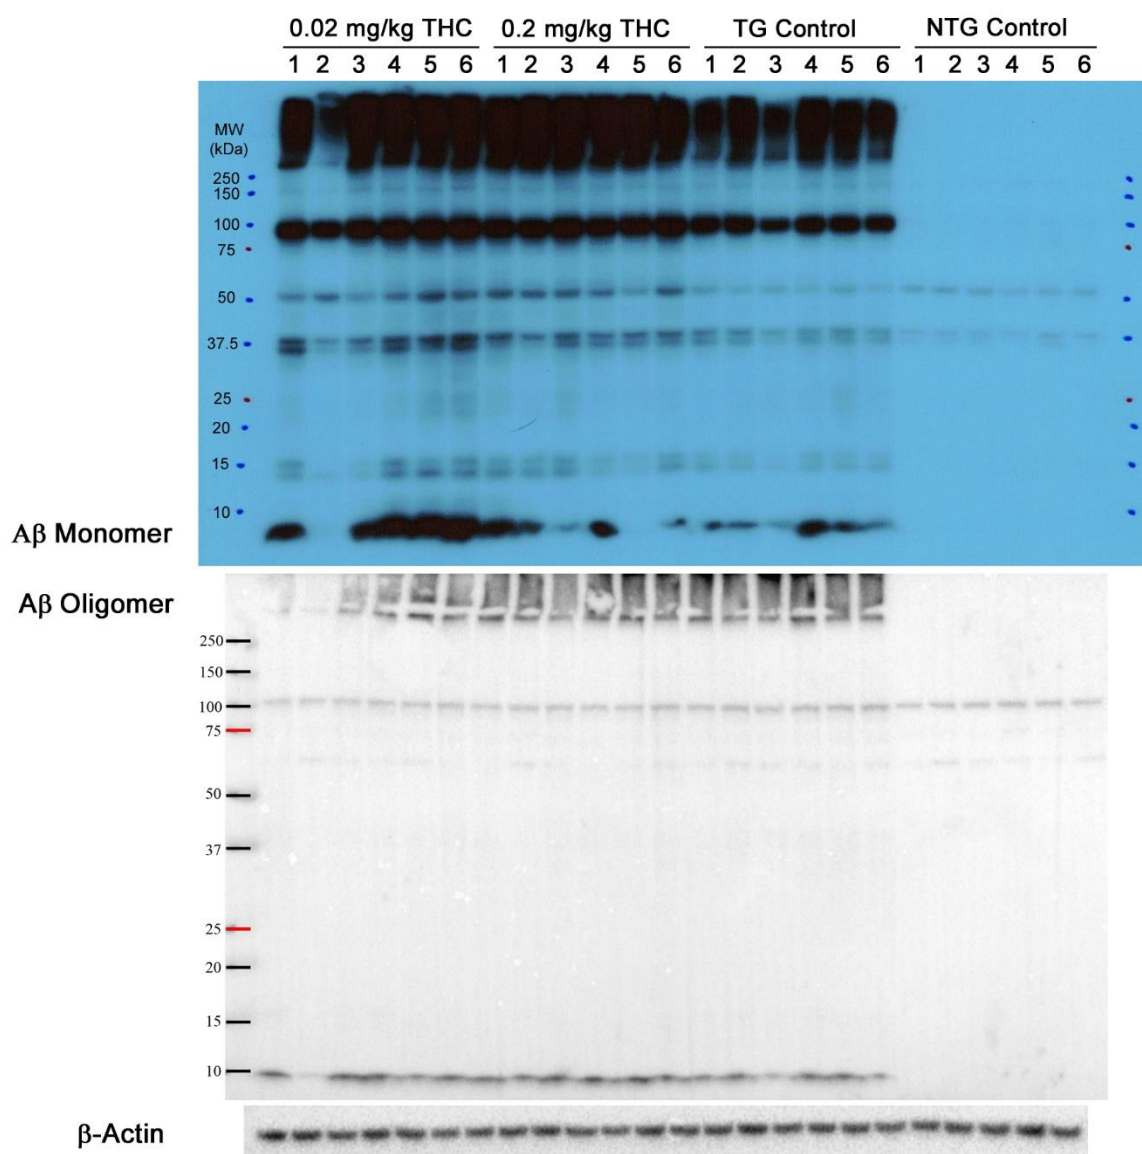

**Figure S2.** Western blot images of the expression of Aβ monomers and Aβ oligomers in individual brain homogenate samples collected from control non-transgenic (NTG) (N = 6), control transgenic APP/PS1 (TG), 0.02 mg/kg (N = 6) and 0.2 mg/kg (N = 6) THC treatment groups. β-Actin served as the loading control.
